# Supplementary figures and images for: Sulfated polysaccharide from Enteromorpha prolifera increases hydrogen sulfide production and attenuates non-alcoholic fatty liver disease in high-fat diet rats
Source: Royal Society of Chemistry journal article supplement (doi:10.1039/c8fo00518d), 2018-01-01

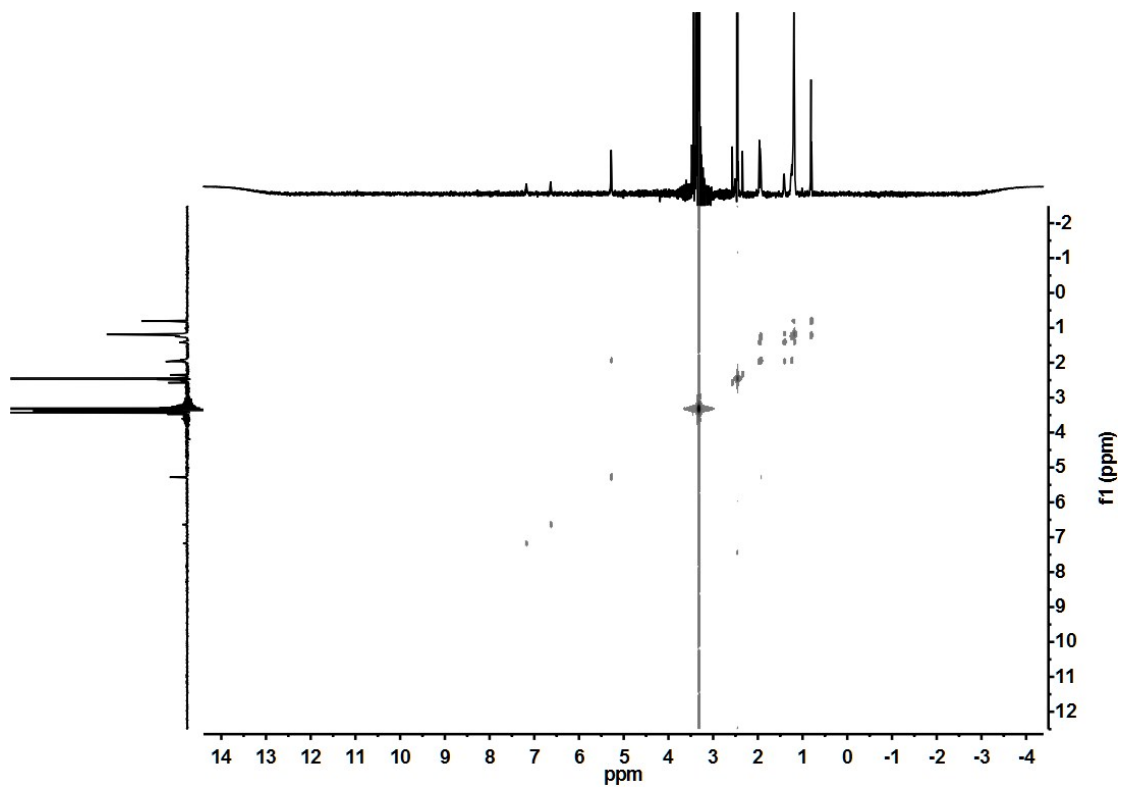

Fig. S1 2D  $^1\text{H}$  NMR spectra of EP

Supplement: c8fo00518d1.pdf [file c8fo00518d1.pdf]
